# Supplementary material for: Proteomic Study of Aqueous Humor and Its Application in the Treatment of Neovascular Glaucoma
Source: Front Mol Biosci. 2020 Oct 8;7:587677. doi: 10.3389/fmolb.2020.587677 (PMC7580691; doi:10.3389/fmolb.2020.587677)
Supplement: TABLE S3 — Detailed AH protein list of 4 previous studies and our study. [file Table_3.XLS]

## Sheet: protein list of 5 study
our study	Krishna R. Murthy	Chowdhurry UR	YinghongJi	Sunil S. Adav
A0A075B6I0	A0AVI2	O00462	A0M8Q6	A0A075B6H6
A0A075B6I9	A8MV23	O00468	A6NJ16	A0A075B6I0
A0A075B6J9	B9A064	O00533	A8MZ36	A0A075B6I8
A0A075B6K4	O00115	O00584	B0YIW2	A0A075B6J4
A0A075B6Q5	O00241	O14773	B1AHL2	A0A075B6K3
A0A075B6S5	O00391	O15031	B3KUE5	A0A075B6K5
A0A087WSY6	O00410	O15537	B4E1F0	A0A075B6N7
A0A087WSZ0	O00411	O43505	B4E1H2	A0A075B6R9
A0A087WW87	O00461	O43827	B4E1Z4	A0A075B7B8
A0A0A0MRZ8	O00462	O60888	B4E351	A0A075B7D8
A0A0A0MS14	O00468	O60938	B4E3Q1	A0A087WSY6
A0A0A0MS15	O00505	O75223	B7Z1I4	A0A087WTA8
A0A0A0MT36	O00533	O75326	B7ZKJ8	A0A087WTE1
A0A0A0MT89	O00584	O75503	B9A064	A0A087WTU7
A0A0B4J1U3	O14498	O75882	C9J0B0	A0A087WU91
A0A0B4J1V0	O14773	O94985	C9JEU5	A0A087WUS2
A0A0B4J1X5	O14791	O95969	C9JF17	A0A087WVG2
A0A0B4J1X8	O15031	P00338	C9JIZ6	A0A087WW44
A0A0B4J1Y8	O15072	P00352	C9JNY7	A0A087WW55
A0A0B4J1Y9	O15228	P00390	C9JPG5	A0A087WW89
A0A0B4J2D9	O15240	P00441	C9JUU1	A0A087WWL5
A0A0C4DH25	O15335	P00450	C9JV77	A0A087WYJ9
A0A0C4DH29	O15354	P00491	D3YTA8	A0A087WYL3
A0A0C4DH31	O15534	P00492	D6R934	A0A087WZ65
A0A0C4DH33	O43196	P00734	D6REX5	A0A087WZW9
A0A0C4DH34	O43491	P00736	D6RF35	A0A087X0B9
A0A0C4DH38	O43493	P00742	D6RFL4	A0A087X0P6
A0A0C4DH68	O43592	P00746	D6RHI9	A0A087X105
A0A0C4DH72	O43790	P00747	E5RJI8	A0A087X1J7
A0A0J9YX35	O43827	P00748	E7EMM4	A0A0A0MR87
A2RUS2	O43854	P00751	E7EMS2	A0A0A0MRZ1
A6BM72	O60216	P00915	E7EQB2	A0A0A0MS13
A6NJG6	O60244	P00918	E7EQR8	A0A0A0MSI2
A6NMB1	O60264	P01008	E7ETH0	A0A0A0MST8
A6NMY6	O60333	P01009	E7EUF1	A0A0A0MSV6
A8MV23	O60488	P01011	E7EX29	A0A0A0MT36
O00115	O60568	P01019	E9PC35	A0A0B4J1V4
O00142	O60575	P01023	E9PEV0	A0A0B4J1V5
O00187	O60938	P01024	E9PG94	A0A0B4J1X8
O00391	O75093	P01031	E9PGA6	A0A0B4J1Z4
O00423	O75326	P01033	E9PIT3	A0A0B4J1Z7
O00461	O75493	P01034	E9PJ29	A0A0C4DFP6
O00468	O75533	P01036	E9PL83	A0A0C4DFV9
O00533	O75882	P01040	E9PNN6	A0A0C4DFX3
O00571	O76011	P01042	E9PR17	A0A0C4DFY7
O00584	O76041	P01834	E9PR44	A0A0C4DG39
O00635	O94760	P01857	F5GXR6	A0A0C4DGZ9
O14498	O94766	P01859	F5GXS5	A0A0C4DH25
O14773	O94813	P01861	F5GY03	A0A0C4DH31
O14786	O94856	P02042	F5H003	A0A0C4DH34
O14791	O94919	P02647	F5H041	A0A0G2JNJ8
O14793	O94985	P02649	F5H4W9	A0A0G2JPF8
O14958	O95084	P02652	F5H6I0	A0A0G2JPS8
O14960	O95196	P02671	F5H7G1	A0A0G2JRQ6
O15031	O95274	P02675	F5H8D1	A0A0J9YX35
O15230	O95336	P02679	F6S8M0	A0A0J9YXX1
O15240	O95427	P02741	F6SYF8	A0A0J9YY99
O15537	O95428	P02743	F8VV32	A0A0U1RQE0
O43432	O95715	P02745	F8W1Q3	A0A0U1RQK7
O43493	O95967	P02746	F8W775	A0A0U1RRF4
O43505	O96000	P02747	F8W791	A0A0U1RRJ0
O43583	O96019	P02748	F8W7G7	A0A140T8X2
O43692	P00338	P02749	F8W7M9	A0A140TA44
O43707	P00352	P02750	F8WE04	A1L4K1-2
O43827	P00390	P02751	G3V1E2	A4D0V7
O43866	P00441	P02753	G3V3D1	A4D256
O60282	P00450	P02760	G3V511	A6NCW0
O60361	P00505	P02763	G3XAE6	A6NFH5
O60575	P00558	P02765	G3XAM2	A6NFQ7
O60613	P00734	P02766	H0Y4I5	A6NHY2
O60879	P00738	P02768	H0Y7A7	A6NIM6
O60888	P00746	P02774	H0YAC1	A6NKB8
O75223	P00747	P02787	H0YF95	A6NNF7
O75306	P00748	P02788	H0YG94	A7MBM2
O75326	P00751	P02790	H3BLU2	A9QM74
O75339	P00915	P02792	H3BPL5	B4E1Z4
O75369	P00918	P02794	H3BS10	B5MCY1
O75390	P01008	P03950	H7BYL6	B7ZM99
O75431	P01009	P03952	H7C3P4	B8ZZD3
O75618	P01011	P04004	J3KNP4	B8ZZY4
O75629	P01019	P04040	J3KQ60	B9A064
O75711	P01023	P04075	J3KQ66	C9JEU5
O75787	P01024	P04083	J3KRP0	C9JQI7
O75882	P01031	P04114	J3QKW8	C9JSR0
O75964	P01033	P04156	J3QTR3	D3DWC4
O76076	P01034	P04196	K7EKI0	D3YTG3
O94760	P01042	P04217	K7ELW0	D6RB49
O94856	P01127	P04278	K7ERG9	D6RF35
O94910	P01344	P04406	K7ERI9	E7EN20
O94919	P02452	P04745	K7ES70	E7EPS8
O94925	P02458	P05060	M9MML0	E7ER44
O94985	P02489	P05067	O00115	E7ER45
O95428	P02511	P05089	O00468	E7EUF1
O95445	P02533	P05090	O00533	E9PCX5
O95477	P02538	P05109	O00533-2	E9PF10
O95715	P02647	P05154	O14498	E9PF55
O95750	P02649	P05155	O14773	E9PGC0
O95897	P02652	P05156	O15020	E9PR17
O95965	P02671	P05452	O15085-2	E9PRC5
O95967	P02675	P05543	O15240	F5GY80
O95994	P02679	P05546	O15354	F5H1D6
P00352	P02741	P06396	O15537	F5H283
P00441	P02745	P06576	O43493	F6X2W2
P00450	P02746	P06681	O43505	F8VV52
P00558	P02747	P06702	O43827	F8VYK9
P00734	P02748	P06703	O60423	F8W6X9
P00736	P02749	P06727	O60469	G3V3E8
P00738	P02750	P06733	O60883	G3V3T2
P00740	P02751	P06744	O60888	G3V3X5
P00742	P02753	P06753	O75326	G3XAM2
P00746	P02760	P06865	O75882	G8JLM4
P00747	P02763	P07195	O95196	H0Y2Q1
P00748	P02765	P07225	O95428	H0Y4R2
P00751	P02766	P07315	P00352	H0Y599
P00918	P02768	P07320	P00441	H0Y5H9
P01008	P02774	P07333	P00450	H0Y5L4
P01009	P02775	P07339	P00734	H0Y7A7
P01011	P02787	P07355	P00736	H0YKJ1
P01019	P02790	P07357	P00738	H0YKM0
P01023	P02792	P07358	P00739	H0YLI6
P01024	P02794	P07360	P00747	H3BNS4
P01031	P02810	P07451	P00915	H7BXZ5
P01033	P02812	P07585	P00918	H7BYX6
P01034	P03950	P07602	P01008	H7C0I1
P01040	P03952	P07686	P01009	H7C3E1
P01042	P04004	P07711	P01011	H7C3G0
P01344	P04040	P07858	P01019	H9KV90
P01591	P04062	P07998	P01023	I3L0T4
P01593	P04070	P08107	P01024	J3KP11
P01599	P04075	P08185	P01031	J3KPG5
P01601	P04085	P08195	P01034	J3QSS1
P01619	P04156	P08253	P01042-2	K7EIG9
P01624	P04196	P08294	P01593	K7EIQ3
P01700	P04217	P08571	P01602	K7EIS2
P01701	P04259	P08603	P01608	K7EIZ3
P01703	P04264	P08697	P01609	K7ELW0
P01704	P04278	P08758	P01610	K7EQT7
P01705	P04406	P09104	P01611	K7ERG9
P01706	P04439	P09211	P01612	O00142-2
P01709	P04626	P09486	P01613	O00391
P01717	P04792	P09871	P01619	O00409-2
P01721	P05060	P0C0L4	P01622	O00468-3
P01742	P05067	P0C0L5	P01624	O00533-2
P01743	P05090	P10451	P01699	O00562
P01766	P05141	P10523	P01703	O00584
P01780	P05154	P10643	P01714	O14498
P01782	P05155	P10745	P01717	O14594
P01814	P05156	P10909	P01743	O14841
P01834	P05388	P11142	P01760	O14964
P01859	P05408	P12109	P01763	O15031
P01860	P05452	P12259	P01766	O15047
P01861	P05543	P12273	P01767	O15055
P01871	P05546	P13473	P01772	O15061
P01876	P05813	P13591	P01779	O15068-6
P02144	P06396	P13639	P01781	O15118
P02452	P06681	P13671	P01824	O15195
P02458	P06727	P13716	P01833	O15240
P02489	P06733	P13987	P01834	O15354
P02511	P06737	P14174	P01857	O15357
P02533	P06744	P14314	P01859	O15534
P02538	P06753	P14543	P01861	O15537
P02647	P07108	P14618	P01871	O15553
P02649	P07195	P14923	P01876	O43143
P02652	P07315	P15121	P01877	O43149-2
P02656	P07316	P15291	P02042	O43286
P02671	P07320	P15531	P02489	O43505
P02675	P07333	P15586	P02533	O60216
P02679	P07339	P15924	P02538	O60235
P02741	P07355	P16035	P02647	O60248-2
P02743	P07357	P16070	P02649	O60292
P02745	P07358	P16870	P02671	O60307
P02746	P07360	P17050	P02671-2	O60671-2
P02747	P07451	P17174	P02675	O60938
P02748	P07477	P17900	P02743	O75093
P02749	P07585	P18065	P02747	O75153
P02750	P07686	P18669	P02748	O75298
P02751	P07711	P19021	P02749	O75326
P02753	P07738	P19022	P02750	O75366
P02760	P07858	P19652	P02751	O75387-2
P02763	P07900	P19823	P02760	O75556
P02765	P07954	P19827	P02763	O75882
P02766	P07998	P20933	P02766	O75896
P02768	P08123	P22304	P02768	O94851-3
P02774	P08174	P22352	P02774-3	O94911-3
P02786	P08185	P22692	P02787	O94985-2
P02787	P08253	P22914	P02790	O94986
P02788	P08294	P23142	P03950	O95155
P02790	P08519	P23471	P04004	O95185
P02792	P08571	P24592	P04196	O95196
P02814	P08603	P24593	P04208	O95428-6
P03950	P08670	P25311	P04211	O95714
P03952	P08697	P26927	P04217	O95786
P03973	P08727	P27169	P04259	O95825
P04003	P08758	P27797	P04264	O96020
P04004	P08779	P28066	P04430	P00338-2
P04075	P09104	P29279	P04433	P00352
P04080	P09211	P29401	P04438	P00441
P04083	P09382	P29508	P05060	P00450
P04114	P09417	P29622	P05067-11	P00734
P04156	P09471	P30041	P05109	P00736
P04196	P09486	P30086	P05154	P00738
P04216	P09497	P30740	P05452	P00742
P04217	P09871	P30838	P05543	P00747
P04229	P09960	P31025	P05546	P00748
P04264	P09972	P31151	P05813	P00915
P04271	P0C0L4	P31944	P06309	P00918
P04278	P0C0L5	P31947	P06313	P01008
P04279	P0C870	P32119	P06316	P01009
P04406	P0CG48	P33908	P06331	P01011
P04430	P10253	P34931	P06396	P01019
P04745	P10451	P35237	P06703	P01023
P04792	P10523	P35443	P06727	P01024
P05060	P10599	P35542	P06733	P01031
P05067	P10619	P35555	P07225	P01033
P05090	P10643	P35858	P07315	P01034
P05154	P10644	P36222	P07320	P01040
P05155	P10645	P36955	P07339	P01042-2
P05156	P10745	P36980	P07357	P01344
P05160	P10909	P37837	P07358	P01593
P05408	P11021	P40189	P07451	P01594
P05413	P11142	P40925	P07686	P01596
P05452	P11413	P41222	P07711	P01597
P05543	P11488	P43251	P07858	P01599
P05546	P12107	P43320	P07998	P01611
P05813	P12109	P43652	P08107	P01612
P06276	P12110	P46782	P08123	P01617
P06280	P12111	P47929	P08185	P01619
P06312	P12259	P48058	P08253	P01699
P06331	P12271	P48637	P08294	P01701
P06396	P12277	P48723	P08571	P01702
P06576	P12532	P49788	P08603	P01703
P06681	P12814	P49908	P08697	P01708
P06702	P12955	P51693	P08779	P01714
P06703	P13489	P51884	P09104	P01717
P06727	P13521	P52209	P09486	P01767
P06732	P13591	P53674	P09871	P01781
P06733	P13639	P54802	P0C0L4	P01859
P06744	P13645	P55083	P0C0L5	P01861
P06858	P13646	P55285	P0CG05	P01876
P06865	P13647	P59665	P10153	P02042
P07093	P13671	P60174	P10451	P02452
P07195	P13746	P60709	P10451-5	P02533
P07225	P13747	P61626	P10599	P02538
P07288	P13987	P61769	P10606	P02647
P07315	P14136	P61812	P10645	P02649
P07316	P14174	P61916	P10745	P02656
P07320	P14314	P62258	P10809	P02671
P07333	P14550	P62937	P10909	P02675
P07339	P14555	P62988	P10909-5	P02730-2
P07357	P14618	P63104	P11279	P02741
P07358	P14923	P68104	P12109	P02747
P07360	P15289	P68871	P12259	P02748
P07451	P15291	P69891	P12273	P02749
P07477	P15586	P69905	P13473-3	P02750
P07585	P15814	P78417	P13521	P02751-5
P07602	P15924	P78509	P13645	P02760
P07686	P16035	P80188	P13647	P02763
P07711	P16152	P81605	P13671	P02765
P07858	P16188	P98160	P14618	P02766
P07900	P16519	P98164	P14921-3	P02768
P07996	P16870	Q01459	P15814	P02774-3
P07998	P16930	Q01469	P15924	P02787
P08123	P17050	Q01955	P15924-3	P02790
P08138	P17174	Q02246	P16035	P02792
P08174	P17483	Q02809	P16870	P03950
P08185	P17643	Q02818	P17066	P04003
P08195	P17858	Q03591	P19022	P04004
P08236	P17936	Q04756	P19652	P04040
P08238	P18065	Q06033	P19823	P04156-2
P08253	P18085	Q06481	P19827	P04196
P08294	P18405	Q06830	P20827	P04217
P08519	P18428	Q07507	P20849	P04264
P08571	P18669	Q08188	P20933	P04406
P08590	P19021	Q08380	P21246	P04792
P08603	P19022	Q08554	P22352	P05023
P08670	P19320	Q08629	P22692	P05060
P08697	P19652	Q10471	P22914	P05067-9
P08779	P19823	Q12805	P23083	P05090
P09104	P19827	Q12841	P23471	P05154
P09211	P20062	Q12860	P24592	P05155-3
P09382	P20396	Q12907	P24593	P05408-2
P09429	P20774	Q13228	P25311	P05451
P09466	P20849	Q13449	P26447	P05452
P09486	P20930	Q13510	P27797	P05543
P09525	P21333	Q13822	P29622	P05546
P09651	P22223	Q14055	P30086	P05787-2
P09668	P22304	Q14118	P30622	P06310
P09871	P22314	Q14126	P30838	P06313
P09936	P22352	Q14393	P31025	P06331
P09972	P22626	Q14515	P31146	P06340
P0C0L4	P22692	Q14520	P31431	P06396
P0C0L5	P22914	Q14563	P31947	P06576
P0DJI8	P23142	Q14574	P32119-2	P06702
P0DKV0	P23470	Q14624	P33908	P06727
P0DMV9	P23471	Q14767	P34096	P06733
P0DOX2	P23528	Q15113	P35527	P07225
P0DOX3	P24592	Q15582	P35542	P07315
P0DOX4	P24593	Q15904	P35555	P07320
P0DOX5	P25311	Q16270	P35858-2	P07333
P0DOX7	P26641	Q16610	P35908	P07339
P0DOX8	P26998	Q16706	P36222	P07355-2
P0DOY2	P27169	Q16769	P36955	P07357
P0DP58	P27348	Q6EMK4	P41222	P07360
P0DPK3	P27361	Q7Z3B1	P41271-2	P07602
P10253	P27797	Q7Z7G0	P43251	P07686
P10323	P27918	Q7Z7M0	P43320	P07858
P10451	P28482	Q86YZ3	P43652	P07998
P10523	P28799	Q8N475	P47929	P08100
P10586	P29401	Q8WVQ1	P49908	P08185
P10599	P29622	Q8WY21	P51693	P08253-3
P10619	P29762	Q92520	P51884	P08294
P10643	P30041	Q92563	P51888	P08493
P10645	P30086	Q92752	P53673	P08571
P10720	P30101	Q92765	P53674	P08603
P10745	P30154	Q92820	P55083-2	P08697
P10909	P30301	Q92823	P55268	P08779
P10916	P30531	Q92859	P60174	P09211
P11021	P30740	Q96IY4	P61626	P09486
P11117	P30838	Q96KN2	P62328	P09497
P11684	P31025	Q96P63	P62805	P09871
P11766	P31153	Q96PD5	P62937	P09972
P11801	P31431	Q96S96	P63261	P0C0L5
P12109	P31944	Q98YJ0	P68871	P0C7Q3
P12110	P32004	Q99435	P69905	P10253
P12111	P32754	Q99574	P78324	P10643
P12259	P33908	Q99969	P80723	P10645
P12270	P34059	Q9BQT9	P80748	P10745
P12273	P34096	Q9BRK5	P81605	P10909-2
P12429	P34913	Q9BTY2	P98160	P11277-2
P12829	P34931	Q9BXJ4	P98164	P12109
P12830	P35030	Q9BXP8	Q01459	P12236
P12883	P35237	Q9BYH1	Q01469	P12259
P13473	P35241	Q9H4D0	Q01995	P12273
P13521	P35443	Q9HAT2	Q02413	P12314
P13591	P35527	Q9HCB6	Q02747	P13473-2
P13611	P35542	Q9NPR2	Q02818	P13521
P13645	P35555	Q9NQ79	Q03164	P13645
P13647	P35858	Q9NS85	Q03591	P13647
P13671	P35908	Q9NT99	Q06481	P13671
P13796	P36222	Q9NZ08	Q06481-6	P14151-2
P13987	P36871	Q9P121	Q06830	P14618-2
P14151	P36873	Q9P2S2	Q08380	P15924
P14314	P36955	Q9UBM4	Q08554	P16035
P14543	P36980	Q9UBP4	Q08629	P16066
P14550	P37837	Q9UBR2	Q12805	P16070-7
P14555	P38606	Q9UBX7	Q12841	P16519-2
P14618	P38919	Q9UGM5	Q12860	P16870-2
P14678	P39060	Q9UHL4	Q13790	P17900
P14866	P40121	Q9UI42	Q14019	P18065
P15169	P40189	Q9UK55	Q14050	P18135
P15289	P40925	Q9UM22	Q14055	P18428
P15291	P41222	Q9UNW1	Q14118	P18433-2
P15309	P41250	Q9Y4C0	Q14126	P19021
P15586	P41271	Q9Y5W5	Q14515	P19022
P15924	P42025		Q14563	P19652
P16035	P42857		Q15113	P19827
P16152	P43121		Q15582	P20774
P16401	P43234		Q15828	P20827
P16519	P43251		Q16270	P20849
P16870	P43320		Q16378	P20933
P17050	P43652		Q16610-4	P21246
P17174	P46459		Q16769	P21796
P17540	P47929		Q16825	P22531
P17643	P48058		Q17R60	P22692
P17661	P48163		Q2VPJ9-2	P22695
P17900	P48357		Q495A1	P22914
P17936	P48594		Q53EL9	P23142
P18065	P48637		Q5H9A7	P23142-4
P18428	P48643		Q5KU26	P23219-3
P18669	P48723		Q5T123	P23458
P19013	P49189		Q5T985	P23471-2
P19021	P49641		Q5VY30	P24593
P19022	P49747		Q5VZE7	P25092
P19320	P49788		Q6EMK4	P25205-2
P19429	P49910		Q6MZW2	P25311
P19652	P50395		Q6UWP8	P25705
P19823	P50453		Q6UXD5-3	P27169
P19827	P50897		Q6UXD5-5	P27797
P20142	P50914		Q6ZP65	P28039
P20151	P51398		Q7Z3B1	P28799-2
P20396	P51532		Q86UD1	P29622
P20774	P51665		Q86UX2	P30086
P20827	P51693		Q86X29	P30281
P20849	P51884		Q86Z14	P30838
P20908	P51888		Q8IWU5-2	P31025
P20933	P52209		Q8IZJ3	P31151
P21246	P52565		Q8N1N4	P31930
P21980	P53396		Q8N475	P32119
P22304	P53673		Q8NBE8	P34096
P22352	P53674		Q8NBJ4	P35030-4
P22692	P54756		Q8NFZ4	P35443
P22695	P54826		Q8TAG5-2	P35527
P22792	P55001		Q8TDN2	P35555
P22914	P55058		Q8WWQ0	P35606
P23142	P55285		Q8WXD2	P35908
P23246	P55290		Q92520	P35968
P23284	P55786		Q92765	P36222
P23327	P58400		Q92823	P36955
P23435	P58546		Q96CC6	P36980-2
P23468	P60174		Q96CV9	P39060-2
P23470	P60709		Q96FE7	P41222
P23471	P60981		Q96FE7-2	P41271-2
P23515	P61019		Q96JP9	P42694
P23528	P61160		Q96MR6	P42695
P24592	P61586		Q96MS3-3	P43251-2
P24593	P61626		Q96PD5	P43320
P25311	P61769		Q96PD5-2	P43652
P25705	P61812		Q96S96	P45378-7
P26038	P61916		Q96SQ9	P45985-2
P26572	P61981		Q99574	P46934-2
P26599	P62258		Q99969	P49711
P26641	P62328		Q99972	P49908
P26927	P62805		Q99996-5	P50443
P27169	P62826		Q9BRK5	P51168-2
P27797	P62937		Q9BSG5-2	P51512
P27918	P63010		Q9BTY2	P51610-4
P28331	P63104		Q9BU40-5	P51617-2
P29279	P63261		Q9BXJ4-3	P51693-2
P29401	P63313		Q9BXP8	P51795-2
P29622	P68104		Q9BY67-3	P51800-2
P30041	P68133		Q9BZV3	P51884
P30043	P68371		Q9H3R0	P51888
P30049	P68871		Q9H4D0	P52569-2
P30050	P69905		Q9H987	P53677
P30086	P78386		Q9HBL6	P54198
P30101	P78509		Q9HBR0	P54253
P30492	P80188		Q9HCB6	P54652
P30838	P80297		Q9HCJ0	P54750-2
P31025	P80723		Q9NQ79-3	P55058
P31944	P81605		Q9NR34	P55060-3
P31949	P84157		Q9NZT1	P55083-2
P32004	P98088		Q9P0U4	P55199
P32119	P98160		Q9P2E2	P55290-4
P33151	P98164		Q9UBM4	P56279
P33908	Q00796		Q9UBR2	P60174
P34096	Q01459		Q9UHB6	P60709
P35443	Q01469		Q9UHG2	P61289-3
P35527	Q01518		Q9UHL4	P61626
P35542	Q02246		Q9UNN8	P61769
P35555	Q02413		Q9Y5W5	P61812
P35580	Q02809		Q9Y646	P62328
P35609	Q02818		Q9Y6R7	P62805
P35625	Q03001		S4R389	P63010
P35858	Q03135		S4R460	P68871
P35908	Q03252		V9GYM3	P69905
P36222	Q03591			P78357
P36542	Q04695			P78509-2
P36955	Q04756			P80188
P36980	Q06033			P80723
P38646	Q06481			P80748
P39060	Q06830			P81605
P40121	Q08188			P98088
P40189	Q08380			P98160
P40925	Q08554			P98164
P41222	Q08629			P98198-3
P42785	Q10567			Q00325-2
P43234	Q12802			Q01629
P43251	Q12805			Q01668-2
P43320	Q12841			Q02388-2
P43652	Q12860			Q02413
P45379	Q12907			Q02487
P47972	Q12934			Q02763
P48058	Q12955			Q02818
P48307	Q13214			Q03001
P48723	Q13231			Q03591
P48735	Q13275			Q04695
P49257	Q13308			Q05BV3
P49747	Q13332			Q06481
P49821	Q13449			Q06828
P49908	Q13510			Q07890
P49913	Q13515			Q08380
P50395	Q13813			Q08ER8
P50553	Q13822			Q09472
P50895	Q13907			Q0GE19
P50897	Q14019			Q0P6D2
P51693	Q14055			Q0VAA5-2
P51884	Q14103			Q12770
P51888	Q14112			Q12805-2
P52565	Q14118			Q12841
P52797	Q14126			Q12860-2
P52803	Q14204			Q13023
P53673	Q14257			Q13061
P53674	Q14344			Q13107-2
P54107	Q14416			Q13214-2
P54108	Q14515			Q13275
P54802	Q14520			Q13324-3
P55001	Q14574			Q13395
P55058	Q14624			Q13449
P55268	Q14657			Q13474
P55283	Q14697			Q13572
P55290	Q14764			Q13683-13
P58499	Q14766			Q14005
P59665	Q14767			Q14050
P60174	Q14894			Q14055
P60709	Q14956			Q14118
P61626	Q14964			Q14315-2
P61769	Q14982			Q14393
P61812	Q14D04			Q14508
P61916	Q15113			Q14511
P62258	Q15124			Q14515
P62937	Q15166			Q14517
P62987	Q15323			Q14520-2
P63316	Q15582			Q14574
P67936	Q15648			Q14587
P68032	Q15818			Q14624
P68871	Q15848			Q14667
P69905	Q15904			Q14686
P78509	Q15911			Q14694-2
P80108	Q16186			Q14956-2
P80188	Q16270			Q15021
P80303	Q16555			Q15113
P80723	Q16568			Q15262
P80748	Q16610			Q15334
P81605	Q16769			Q15413-3
P84157	Q16774			Q15582
P84243	Q16775			Q15652-3
P98160	Q16798			Q15846
P98164	Q17R60			Q15904
P99999	Q2KHR3			Q16270
Q00325	Q3LI72			Q16517
Q00610	Q3MIT2			Q16572
Q00796	Q53EL9			Q16610
Q01459	Q53FA7			Q16760
Q01469	Q56NI9			Q16769
Q02383	Q5BJE1			Q16832
Q02487	Q5D862			Q16849-2
Q02809	Q5H9J7			Q16878
Q02818	Q5H9T9			Q17R60
Q02985	Q5PSV4			Q19AV6
Q03591	Q5SYB0			Q2PPJ7-2
Q04756	Q5T013			Q49MI3-3
Q05639	Q5T749			Q4AC94
Q06033	Q5T750			Q4G0P3
Q06481	Q5TA45			Q53EL9-2
Q06830	Q5TDP6			Q587J8
Q07954	Q5TFQ8			Q5JPB2
Q08345	Q5VST9			Q5JSL3
Q08380	Q5VU65			Q5JT82
Q08397	Q5VWZ2			Q5JWR5
Q08629	Q66K66			Q5KU26
Q0P6D2	Q68DL7			Q5PY61
Q10471	Q6EMK4			Q5SXM2
Q12797	Q6MZW2			Q5T749
Q12805	Q6NUM9			Q5T7B8
Q12830	Q6P1S2			Q5T848
Q12841	Q6S8J3			Q5TGY1-2
Q12860	Q6ULP2			Q5THJ4-2
Q12907	Q6UWP8			Q5VTA0
Q12931	Q6UX71			Q5VTY9-6
Q13011	Q6UXS0			Q5VY30
Q13214	Q6W2J9			Q66K64
Q13228	Q6ZQQ6			Q66K66
Q13308	Q6ZR08			Q68DL7
Q13332	Q71U36			Q6EMB2
Q13449	Q7RTS7			Q6EMK4
Q13508	Q7Z3B1			Q6IMN6-9
Q13510	Q7Z3F1			Q6IWH7
Q13557	Q7Z3Z0			Q6KC79
Q13751	Q7Z569			Q6NUQ1
Q13822	Q7Z6R9			Q6NV74
Q13885	Q7Z794			Q6P2Q9
Q14050	Q7Z7G0			Q6P996-4
Q14055	Q7Z7M0			Q6PCB5
Q14112	Q86SR1			Q6PCT2-2
Q14118	Q86UD1			Q6PJ69
Q14126	Q86W28			Q6Q0C1
Q14257	Q86WA6			Q6TFL4
Q14315	Q86Y38			Q6UB99
Q14393	Q86YF9			Q6UXK5
Q14508	Q86YS6			Q6UXT8
Q14515	Q86YZ3			Q6UXU4-4
Q14520	Q8IUC1			Q6V1X1-6
Q14533	Q8IUE6			Q6VVX0
Q14563	Q8IUX7			Q6ZMV5
Q14574	Q8IWU5			Q6ZN16
Q14588	Q8IZ13			Q6ZNB7
Q14624	Q8IZJ3			Q6ZQN7
Q14697	Q8IZT6			Q6ZS10
Q14766	Q8N114			Q6ZTN6
Q14767	Q8N1N4			Q6ZU64
Q14789	Q8N3J6			Q6ZVH7-2
Q15063	Q8N474			Q6ZVK1
Q15113	Q8N475			Q6ZWE6
Q15223	Q8N4C6			Q71DI3
Q15233	Q8NA61			Q75QN2-2
Q15262	Q8NBI6			Q76I76
Q15293	Q8NBJ4			Q76KP1
Q15375	Q8NET8			Q76NI1-3
Q15582	Q8NEV4			Q7L8L6
Q15818	Q8NEY3			Q7Z2E3-5
Q15828	Q8NF50			Q7Z2T5
Q15846	Q8NF91			Q7Z3E5
Q15904	Q8NFY4			Q7Z3V5
Q16270	Q8NFZ8			Q7Z407-4
Q16363	Q8NHQ9			Q7Z407-5
Q16378	Q8NI22			Q7Z410
Q16568	Q8TAG5			Q7Z443
Q16610	Q8TB40			Q7Z5M8
Q16627	Q8TCZ2			Q7Z6E9
Q16769	Q8TD57			Q7Z6J0-3
Q16775	Q8TE96			Q7Z6J6
Q16777	Q8TEU8			Q7Z6Z7-3
Q16836	Q8WUA8			Q7Z7A1-5
Q16880	Q8WVJ2			Q7Z7B1
Q17R60	Q8WVQ1			Q7Z7G8-2
Q1L5Z9	Q8WXD2			Q7Z7M0
Q24JP5	Q8WY21			Q7Z7M1
Q4KMG0	Q8WZ42			Q86SQ6-1
Q52LW3	Q92484			Q86TB9
Q53EL9	Q92520			Q86UD1
Q53RD9	Q92563			Q86UP0-2
Q5D862	Q92696			Q86UV5-8
Q5EBL4	Q92743			Q86UX2
Q5JQC9	Q92765			Q86V97
Q5KU26	Q92820			Q86Y26-3
Q5T4T6	Q92823			Q86Y38
Q5T601	Q92859			Q86YA3
Q5T749	Q92954			Q86YZ3
Q5T750	Q93034			Q8IU80
Q5TFQ8	Q96EA4			Q8IUC4
Q5VST9	Q96GW7			Q8IW70
Q5VT25	Q96HE9			Q8IWU2
Q5VTT5	Q96IF1			Q8IWY4
Q66K66	Q96IU4			Q8IXS8
Q66K79	Q96IY4			Q8IXT5
Q68DK2	Q96JG9			Q8IYD8
Q6EMK4	Q96JP9			Q8IYW2
Q6FHJ7	Q96KP4			Q8IZD2-5
Q6ICG6	Q96L93			Q8IZD9
Q6IS14	Q96MM3			Q8IZF2
Q6MZW2	Q96NZ9			Q8IZJ3-2
Q6UX71	Q96PD5			Q8N0V5-3
Q6UXB8	Q96PE2			Q8N205
Q6UXD5	Q96S96			Q8N2W9
Q6UXI9	Q96T21			Q8N3J6-2
Q71U36	Q99435			Q8N3K9
Q7L7L0	Q99439			Q8N3Z0
Q7Z3B1	Q99456			Q8N475-2
Q7Z3G6	Q99497			Q8N4P6
Q7Z5L0	Q99519			Q8N6L0
Q7Z794	Q99538			Q8N6S4
Q7Z7G0	Q99574			Q8N895
Q7Z7M0	Q99685			Q8NBJ4
Q86SR1	Q99698			Q8NBJ9-2
Q86TD4	Q99728			Q8NC74
Q86TH1	Q99729			Q8NDL9
Q86U86	Q99784			Q8NDX5-2
Q86UD1	Q99969			Q8NDY8
Q86UX2	Q99972			Q8NEM7
Q86VB7	Q99983			Q8NEZ3
Q86VF7	Q9BQJ4			Q8NF91
Q86VZ4	Q9BQT9			Q8NFC6
Q8IUK5	Q9BRK5			Q8NFN8-2
Q8IUK8	Q9BSG5			Q8NFZ5
Q8IUX7	Q9BTN0			Q8NG11
Q8IWY4	Q9BU40			Q8NI35
Q8IXL6	Q9BVA1			Q8TCT7
Q8IZJ3	Q9BWP8			Q8TD43
Q8N137	Q9BWQ8			Q8TDB6
Q8N3J6	Q9BWV1			Q8TDI0
Q8N3Z0	Q9BXJ0			Q8TDZ2
Q8N474	Q9BXM0			Q8TE12
Q8N475	Q9BXP8			Q8TE96
Q8N4C6	Q9BXW6			Q8TEW6
Q8N5G2	Q9BY67			Q8TEY5
Q8NBJ4	Q9BYB4			Q8TF30
Q8NCC3	Q9BYH1			Q8WUM0
Q8NE18	Q9BYQ2			Q8WUQ7-2
Q8NFZ8	Q9BYT9			Q8WUY3
Q8NHP8	Q9BZV3			Q8WWL2-3
Q8NI22	Q9C035			Q8WWY6
Q8TAG5	Q9GZM5			Q8WXD2
Q8TC20	Q9GZP0			Q8WYP5
Q8TCZ2	Q9GZX9			Q8WYQ9-2
Q8TER0	Q9H299			Q8WZ42-12
Q8TEU8	Q9H4D0			Q8WZ74
Q8WTW3	Q9H6K1			Q92520
Q8WXD2	Q9H6R0			Q92529
Q8WY21	Q9H869			Q92581-3
Q8WZ42	Q9HAT2			Q92621
Q8WZ75	Q9HBW1			Q92738-2
Q8WZA1	Q9HC57			Q92743
Q92484	Q9HCB6			Q92765
Q92520	Q9HCD5			Q92794
Q92563	Q9NP84			Q92820
Q92743	Q9NPR2			Q92823-5
Q92752	Q9NQ79			Q92832-2
Q92765	Q9NQX7			Q93074-2
Q92820	Q9NR77			Q96A33
Q92823	Q9NRJ5			Q96AD5
Q92859	Q9NRN5			Q96C10
Q92896	Q9NS40			Q96D09
Q969H8	Q9NS73			Q96F86
Q96EG1	Q9NS85			Q96FE7-2
Q96FE7	Q9NSB4			Q96HF1
Q96HF1	Q9NT99			Q96IY4
Q96IY4	Q9NUA8			Q96J94
Q96JM4	Q9NY65			Q96JP9
Q96JP9	Q9NYW8			Q96KN2
Q96KG7	Q9NZ08			Q96PD5-2
Q96KN2	Q9NZP8			Q96PN7-4
Q96M95	Q9NZT1			Q96PX9
Q96N46	Q9P121			Q96QZ7
Q96PD5	Q9P1Z0			Q96R06
Q96S96	Q9P2V4			Q96S96
Q99435	Q9UBM4			Q96T58
Q99497	Q9UBP4			Q99250
Q99519	Q9UBR2			Q99435
Q99574	Q9UGM5			Q99459
Q99715	Q9UH90			Q99572
Q99969	Q9UHB6			Q99574
Q99972	Q9UHF0			Q99805
Q99985	Q9UHG2			Q99884
Q9BQT9	Q9UHI8			Q99969
Q9BRA2	Q9UHL4			Q99972
Q9BRK5	Q9UHR5			Q9BQE3
Q9BSG0	Q9UI40			Q9BRK5
Q9BSG5	Q9UJJ9			Q9BRR3
Q9BTY2	Q9UL25			Q9BRZ2
Q9BU40	Q9ULB1			Q9BSC4-4
Q9BWS9	Q9ULL4			Q9BTY2
Q9BWV1	Q9ULX7			Q9BU40
Q9BX67	Q9UNW1			Q9BXP8
Q9BXP8	Q9Y287			Q9BXT8-5
Q9BXW9	Q9Y2I7			Q9BYE2-4
Q9BY67	Q9Y2K3			Q9BZV1
Q9BYH1	Q9Y2Q3			Q9BZV3
Q9BYJ0	Q9Y2S2			Q9BZX2
Q9BYW2	Q9Y2Z0			Q9C035
Q9BZQ8	Q9Y3B8			Q9C0D2
Q9BZV3	Q9Y4A5			Q9C0G6
Q9C0A1	Q9Y4L1			Q9GZL7
Q9GZP0	Q9Y5W5			Q9GZM5
Q9GZP4	Q9Y600			Q9GZZ8
Q9GZX9	Q9Y617			Q9H0D2
Q9H0B8	Q9Y646			Q9H0K1
Q9H2A7	Q9Y6V0			Q9H1I8
Q9H2K8				Q9H3S7
Q9H336				Q9H3U5
Q9H444				Q9H422-2
Q9H4D0				Q9H4Z3
Q9HAT2				Q9H7S9
Q9HBL6				Q9HAW8-2
Q9HCB6				Q9HBG6-5
Q9HCQ7				Q9HC57
Q9NPD7				Q9HCB6
Q9NPH3				Q9HD20
Q9NPR2				Q9NQ86
Q9NQ79				Q9NQX4
Q9NQH7				Q9NR21
Q9NQX4				Q9NRR4-2
Q9NR34				Q9NU22
Q9NR99				Q9NVH6-7
Q9NRN5				Q9NX47
Q9NSB4				Q9NY15
Q9NTU7				Q9NYQ6
Q9NVN3				Q9NYQ8
Q9NZ08				Q9NYW2
Q9NZ53				Q9NZJ4
Q9NZK5				Q9NZN9-4
Q9NZP8				Q9NZP8
Q9NZV1				Q9P0L1
Q9P121				Q9P121
Q9P2N6				Q9P225
Q9P2S2				Q9P227
Q9UBM4				Q9P291
Q9UBP4				Q9P2D8
Q9UBR2				Q9P2G1
Q9UBU2				Q9P2K2
Q9UBX1				Q9P2K8-2
Q9UBX7				Q9P2R3-4
Q9UGM5				Q9UBM4
Q9UHC6				Q9UBP4
Q9UHG2				Q9UBR2
Q9UHI8				Q9UBU9
Q9UHL4				Q9UDY8
Q9UJA9				Q9UGM5
Q9UJC5				Q9UHG2
Q9UJJ9				Q9UHL4
Q9UKX3				Q9UIM3
Q9UKZ9				Q9UJU2-7
Q9ULB1				Q9UKA4
Q9ULI3				Q9UKF7
Q9ULX5				Q9UKG9
Q9ULX7				Q9UKZ4-2
Q9UM11				Q9UL36
Q9UNN8				Q9ULD6-4
Q9UNW1				Q9ULH7-4
Q9Y278				Q9ULK4-4
Q9Y279				Q9ULT6
Q9Y2I7				Q9UM22
Q9Y490				Q9UM73
Q9Y4C0				Q9UNA1-2
Q9Y4G8				Q9UNW1
Q9Y4L1				Q9UPA5
Q9Y5H2				Q9UPN3
Q9Y5W5				Q9Y210
Q9Y5Y7				Q9Y287
Q9Y646				Q9Y2F5
Q9Y6C2				Q9Y2I6
Q9Y6R7				Q9Y2I7
Q9Y6V0				Q9Y4D7
				Q9Y4L5
				Q9Y4R8
				Q9Y561-2
				Q9Y585
				Q9Y5F1
				Q9Y5H1
				Q9Y5W5
				Q9Y618-5
				Q9Y646
				Q9Y672
				Q9Y6R7
				Q9Y6V0-5
				Q9Y6Y0
				V9GYM3
